# Supplementary material for: Equine glucagon-like peptide-1 receptor physiology
Source: PeerJ journal article supplement (doi:10.7717/peerj.4316), 2018-01-29
Supplement: Raw_data_PCR_full_gel_scan_191216.pdf [file Raw_data_PCR_full_gel_scan_191216.pdf]

qlp-1new DIST. FINAL (Raw 1-D Image)

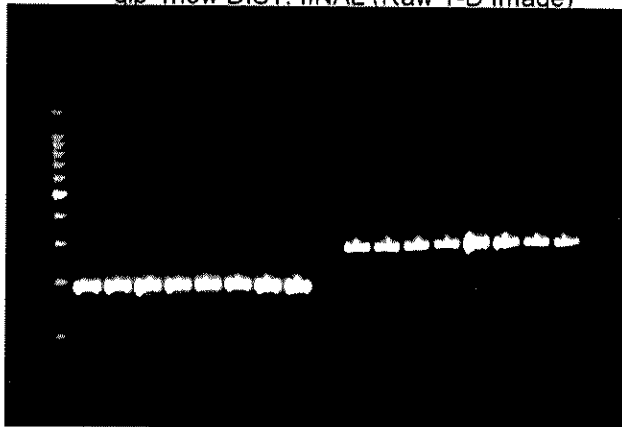

MHLKLF TSI +ve | MHLKLF TSI -ve  
-ve TIC
